# Supplementary material
Source: PubMed Central journal article supplement (PMC4270378)

Supplemental Information for

# A Synchrotron-based Hydroxyl Radical Footprinting Analysis of Amyloid Fibrils and Pre-fibrillar Intermediates with Residue-specific Resolution

Alexandra L. Klinger, Janna Kiselar, Sergei Ilchenko, Hiroaki Komatsu,  
Mark R. Chance and Paul H. Axelsen

Table S1. Modification rates for A $\beta$ 40 fragments (units of s<sup>-1</sup>).

| Modified residue | Residue segment in which the modified residue was identified |       |       |       |       |       |       |       |       |       |       |
|------------------|--------------------------------------------------------------|-------|-------|-------|-------|-------|-------|-------|-------|-------|-------|
|                  | 4-10                                                         | 10-17 | 11-19 | 20-33 | 21-31 | 21-33 | 21-34 | 24-34 | 34-40 | 35-40 | 36-40 |
| F4               | 5.5                                                          |       |       |       |       |       |       |       |       |       |       |
| Y10              | 5.5                                                          | 9.4   |       |       |       |       |       |       |       |       |       |
| H13              |                                                              | 4.6   | 4.7   |       |       |       |       |       |       |       |       |
| H14              |                                                              | 5.7   | 5     |       |       |       |       |       |       |       |       |
| L17              |                                                              |       | 4.5   |       |       |       |       |       |       |       |       |
| F19              |                                                              |       | 6.2   |       |       |       |       |       |       |       |       |
| F20              |                                                              |       |       | 4.5   |       |       |       |       |       |       |       |
| V24              |                                                              |       |       | 5.1   | 4.8   |       | 4.9   | 5     |       |       |       |
| K28              |                                                              |       |       | 11.3  | 11.5  | 10    | 8.2   | 10    |       |       |       |
| I31              |                                                              |       |       | 7.5   | 7.9   | 7.7   | 7.2   | 7.1   |       |       |       |
| I32              |                                                              |       |       | 8     | 7.6   | 7.5   | 7.6   | 7.1   |       |       |       |
| L34              |                                                              |       |       |       |       |       | 6.9   | 5.4   | 3.4   |       |       |
| M35              |                                                              |       |       |       |       |       |       |       | 10    | 19    |       |
| V36,V39,V40*     |                                                              |       |       |       |       |       |       |       | 14.8  |       | 17.5  |

\* Fragments containing three C-terminal valine residues were not chromatographically resolved.

Table S2. Modification rates for LWM A $\beta$ 40 (units of s<sup>-1</sup>).

| Modified residue | Residue segment in which the modified residue was identified |      |       |       |      |       |       |       |       |       |
|------------------|--------------------------------------------------------------|------|-------|-------|------|-------|-------|-------|-------|-------|
|                  | 4-19                                                         | 4-17 | 10-19 | 11-19 | 1-17 | 20-33 | 20-34 | 21-34 | 34-40 | 35-40 |
| F4               | 2                                                            |      |       |       | 4.2  |       |       |       |       |       |
| Y10              | 3.1                                                          | 3.1  | 2.3   |       | 3.7  |       |       |       |       |       |
| H13              | 2.1                                                          | 3.2  | 2.3   | 2.3   |      |       |       |       |       |       |
| H14              | 2.1                                                          | 3.4  | 3     | 3     |      |       |       |       |       |       |
| L17              |                                                              |      | 2.7   |       |      |       |       |       |       |       |
| F19              | 2.4                                                          |      | 3     | 2.3   |      |       |       |       |       |       |
| F20              |                                                              |      |       |       |      |       | 4.1   |       |       |       |
| V24              |                                                              |      |       |       |      |       | 4.7   |       |       |       |
| K28              |                                                              |      |       |       |      | 1.5   | 1.2   | 1.7   |       |       |
| I31              |                                                              |      |       |       |      | 6     | 5     | 6.5   |       |       |
| I32              |                                                              |      |       |       |      | 1.41  | 0.45  | 0.47  |       |       |
| L34              |                                                              |      |       |       |      |       | 1.2   | 0.55  |       |       |
| M35              |                                                              |      |       |       |      |       |       |       | 12    |       |
| V36,V39,V40*     |                                                              |      |       |       |      |       |       |       | 1.9   | 1.6   |

\* Fragments containing three C-terminal valine residues were not chromatographically resolved.

Table S3. Modification rates for fibrillar A $\beta$ 40 (units of s<sup>-1</sup>).

| Modified Residue | Residue segment in which the modified residue was identified |      |       |       |      |       |       |       |       |       |
|------------------|--------------------------------------------------------------|------|-------|-------|------|-------|-------|-------|-------|-------|
|                  | 4-19                                                         | 4-17 | 10-19 | 11-19 | 1-17 | 20-33 | 20-34 | 21-34 | 34-40 | 35-40 |
| F4               | 1.06                                                         |      |       |       | 1.6  |       |       |       |       |       |
| Y10              | 2                                                            | 1.8  | 1.3   |       | 1.7  |       |       |       |       |       |
| H13              | 0.14                                                         | 0.1  | 0.07  | 0.11  |      |       |       |       |       |       |
| H14              | 0.19                                                         | 0.4  | 0.29  | 0.6   |      |       |       |       |       |       |
| L17              |                                                              |      | 0.15  |       |      |       |       |       |       |       |
| F19              | 0.07                                                         |      | 0.08  | 0.12  |      |       |       |       |       |       |
| F20              |                                                              |      |       |       |      |       | 0.94  |       |       |       |
| V24              |                                                              |      |       |       |      |       | 0.31  |       |       |       |
| K28              |                                                              |      |       |       |      | 0.15  | 0.14  | 0.3   |       |       |
| I31              |                                                              |      |       |       |      | 0.37  | 0.73  | 0.42  |       |       |
| I32              |                                                              |      |       |       |      | 0.12  | 0.1   | 0.18  |       |       |
| L34              |                                                              |      |       |       |      |       | 0.09  | 0.04  |       |       |
| M35              |                                                              |      |       |       |      |       |       |       | 2.4   | 2.1   |
| V36/39/40*       |                                                              |      |       |       |      |       |       |       | 0.04  | 0.03  |

\* Fragments containing three C-terminal valine residues were not chromatographically resolved.

Table S4. Propagation of error analysis for table 1

| Residue          | LMW       |         |                    |                   | Fibril     |           |                    |                   |
|------------------|-----------|---------|--------------------|-------------------|------------|-----------|--------------------|-------------------|
|                  | PF*       | range** | $\mu_{PF}^\dagger$ | $\sigma^\ddagger$ | PF*        | range**   | $\mu_{PF}^\dagger$ | $\sigma^\ddagger$ |
| <b>F4</b>        | <b>2</b>  | (1-4)   | <b>2</b>           | 1.7               | <b>4</b>   | (3-6)     | <b>4</b>           | 2                 |
| <b>Y10</b>       | <b>2</b>  | (1-4)   | <b>2</b>           | 0.8               | <b>4</b>   | (2-7)     | <b>4</b>           | 2                 |
| <b>H13</b>       | <b>2</b>  | (1-3)   | <b>2</b>           | 0.5               | <b>40</b>  | (30-70)   | <b>50</b>          | 24                |
| <b>H14</b>       | <b>2</b>  | (1-3)   | <b>2</b>           | 0.6               | <b>20</b>  | (10-30)   | <b>20</b>          | 9                 |
| <b>L17</b>       | <b>2</b>  | --      | <b>2</b>           | 0.5               | <b>30</b>  | --        | <b>30</b>          | 9                 |
| <b>F19</b>       | <b>2</b>  | (2-3)   | <b>2</b>           | 0.6               | <b>80</b>  | (70-90)   | <b>80</b>          | 19                |
| <b>F20</b>       | <b>2</b>  | (1-2)   | <b>2</b>           | 0.9               | <b>7</b>   | (4-10)    | <b>8</b>           | 4                 |
| <b>V24</b>       | <b>1</b>  | --      | <b>1</b>           | 0.2               | <b>20</b>  | --        | <b>20</b>          | 4                 |
| <b>K28</b>       | <b>7</b>  | (5-11)  | <b>8</b>           | 2.2               | <b>60</b>  | (30-100)  | <b>70</b>          | 52                |
| <b>I31</b>       | <b>1</b>  | (1-2)   | <b>1</b>           | 0.4               | <b>20</b>  | (10-30)   | <b>20</b>          | 10                |
| <b>I32</b>       | <b>10</b> | (6-26)  | <b>13</b>          | 12                | <b>60</b>  | (40-90)   | <b>60</b>          | 26                |
| <b>L34</b>       | <b>6</b>  | (3-15)  | <b>7</b>           | 6.0               | <b>90</b>  | (40-200)  | <b>100</b>         | 82                |
| <b>M35</b>       | <b>1</b>  | (1-2)   | <b>1</b>           | 0.6               | <b>6</b>   | (4-10)    | <b>7</b>           | 3                 |
| <b>V36/39/40</b> | <b>9</b>  | (7-12)  | <b>9</b>           | 2.0               | <b>400</b> | (400-800) | <b>600</b>         | 140               |

\*Protection factor (PF) is defined as  $k_{frag}/k_{struct}$  where  $k_{frag}$  is the average rate of modification of the given residue in the predigested A $\beta$ 40 and  $k_{struct}$  is the average rate of modification of the residue in LMW A $\beta$ 40 or fibril A $\beta$ 40 listed in Table 1.

\*\*The ranges expected for PF's are estimated using the average ( $k$ ) and standard deviation ( $\sigma$ ) of the rates of modification for each amino acid side chain (Table 1). The low end of each range is given by  $(k_{frag} - \sigma_{frag}) / (k_{struct} + \sigma_{struct})$  and the high end of the range by  $(k_{frag} + \sigma_{frag}) / (k_{struct} - \sigma_{struct})$

†The expected value for the protection factor ( $\mu_{PF}$ ) was calculated using the expression derived for the expected value  $\mu_R$  of a ratio  $R=X/Y$ ,

$$\mu_R \cong \frac{\mu_X}{\mu_Y} (1 + CV_Y^2),$$

$\mu_X$  and  $\mu_Y$  are the average modification rates,  $k_{frag}$  and  $k_{struct}$ , respectively and  $CV_Y$  is the coefficient of variability ( $CV_Y = \sigma_Y / \mu_Y$ ).

††The standard deviation of the ratio  $R=X/Y$  is

$$\sigma_R \cong \left( \frac{\mu_X}{\mu_Y} \right) \sqrt{CV_X^2 + CV_Y^2 + 3CV_Y^2 CV_X^2 + 8CV_Y^2}$$

as derived in (Holmes DT, Buhr KA. Error propagation in calculated ratios. *Clinical Biochemistry* 2007;40:728-734.

Figure S1. (a) Electron micrograph of LMW A $\beta$ 40 spotted on a glow-discharged carbon-coated grid and negative stained with methylamine tungstate, showing the characteristic globular oligomeric forms. (b) Silver stained SDS-PAGE analysis of the same LMW preparation of A $\beta$ 40 after PICUP. The band at the bottom is monomeric A $\beta$ 40 (mwt = 4330), and the bands above it represent dimers and higher-order oligomers that are not observed in sham cross-linking experiments.

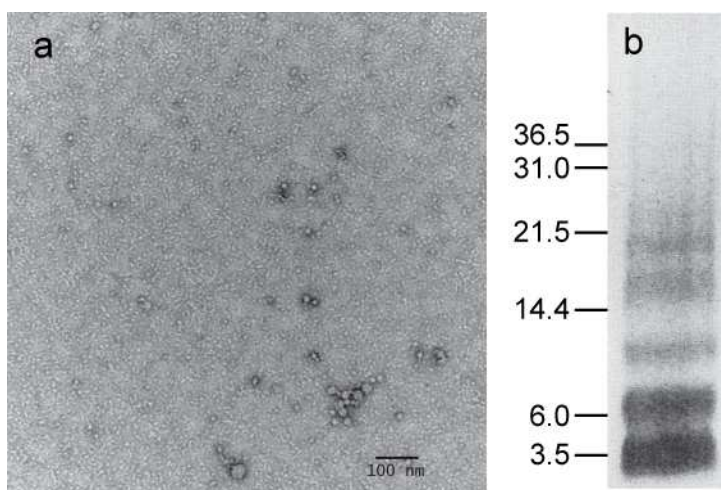

Figure S2. (a-c) Superimposed conformational isomers of full length A $\beta$ 40 NMR models and d) A $\beta$ (1-28) as deposited in the PDB files indicated. Side chains are shown for residues with experimentally determined protection factors.

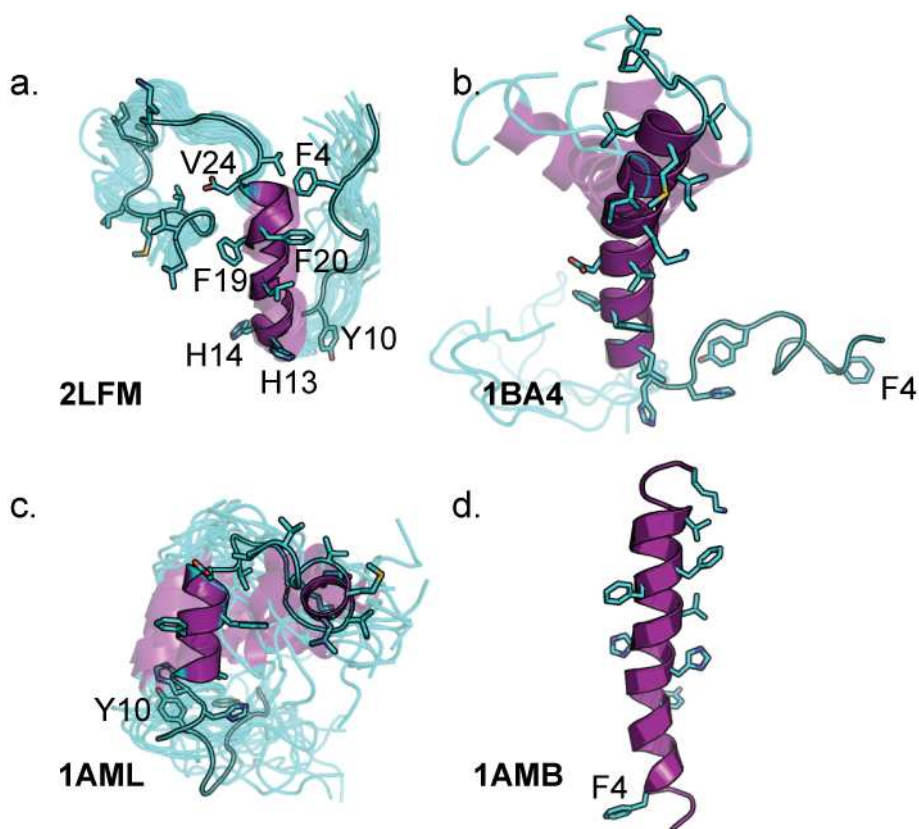

Supplement: bi5010409_si_001.pdf [file bi5010409_si_001.pdf]
